# Supplementary material for: Cdc42 functions as a regulatory node for tumour‐derived microvesicle biogenesis
Source: PubMed Central journal article supplement (PMC7804048; doi:10.1002/jev2.12051), 2021-01-12
Supplement: JEV2-10-e12051-s001.pdf [file JEV2-10-e12051-s001.pdf]

Figure S1

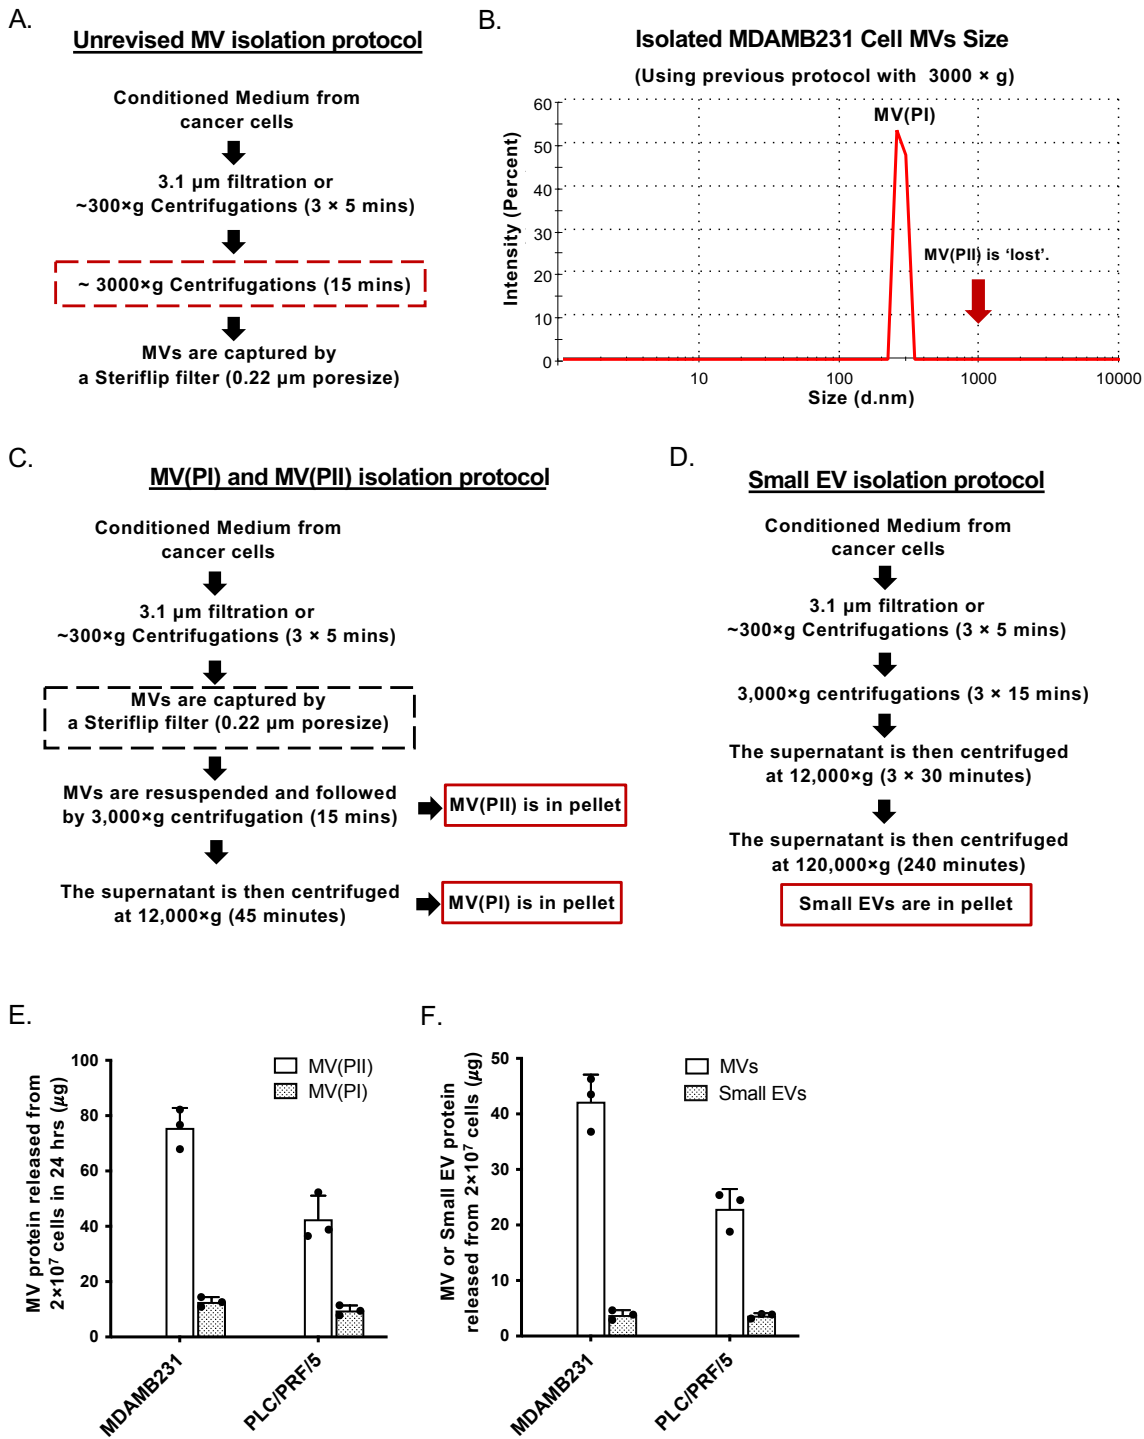

**Figure S1 (Supplementary Figure for Figure 1).** Isolate and quantify tumor cell-derived MVs. **A**, Unrevised MV isolation protocol has steps of  $\sim 3000\times g$  centrifugations. **B**, MVs isolated from conditioned medium collected from MDAMB231 cells using unrevised protocol (has steps of  $\sim 3000\times g$  centrifugations) was analyzed by dynamic light scattering. The MV population II(MV(PII)) was totally 'lost' (indicated by arrow). **C**, MV population I and II (MV(PI) and MV(PII)) isolation protocol. **D**, Small EV isolation protocol. **E**, MV population I and II (MV(PI) and MV(PII)) produced within 24 hours by  $2\times 10^7$  MDAMB231 or PLC/PRF/5 cells were quantified. MV(PII) accounted for more than 80% of total MV protein. **F**, MVs or small EVs produced within 4 hours by  $2\times 10^7$  MDAMB231 or PLC/PRF/5 cells were quantified. MV protein was at least 10 times more than small EV protein.

Figure S2

A.

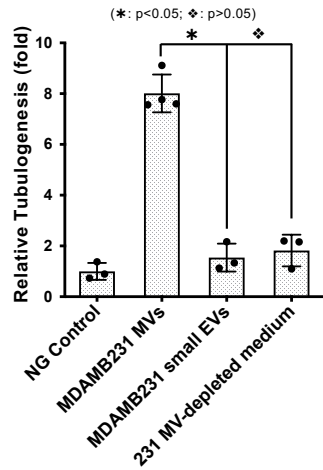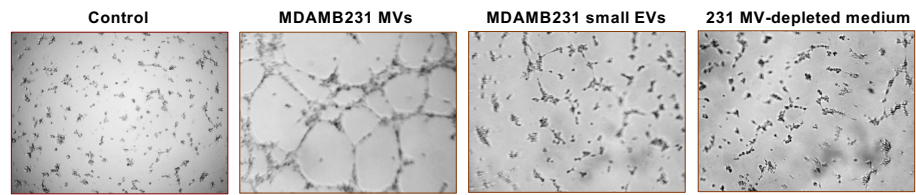

Relative stimulation of Tubulogenesis

| Samples       | NG Control    | MDAMB231 MVs | MDAMB231 small EVs | 231 MV-depleted medium |
|---------------|---------------|--------------|--------------------|------------------------|
| Relative fold | 1.000 ± 0.333 | 8.01 ± 0.742 | 1.54 ± 0.551       | 1.82 ± 0.624           |

B.

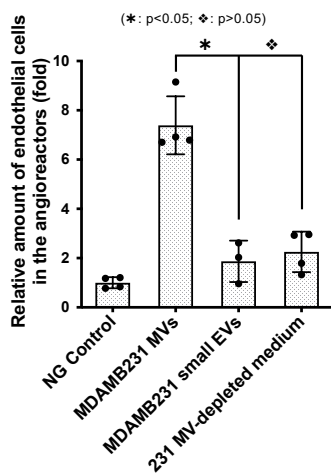

Load angiogenesis activators  
(i.e. cancer cells, rVEGF, MVs)  
into the angioreactors

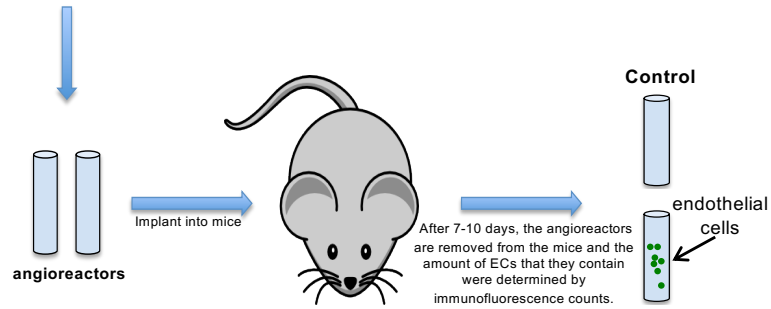

(from Fig. 2a in ref. #20 (Feng et al.))

Amounts of endothelial cells in the angioreactors

| Samples        | NG Control    | MDAMB231 MVs | MDAMB231 small EVs | 231 MV-depleted medium |
|----------------|---------------|--------------|--------------------|------------------------|
| Avg. IF counts | 1785 ± 399.7  | 13193 ± 2106 | 3338 ± 1499        | 4016 ± 1464            |
| Relative fold  | 1.000 ± 0.224 | 7.391 ± 1.18 | 1.87 ± 0.84        | 2.25 ± 0.82            |

**Figure S2 (Supplementary Figure for Figure 2).** **A,** Data and images of the tubulogenesis assays in Figure 2E was presented. **B,** Schematic of the *in vivo* angiogenesis assay (also in ref. #20, Figure 2a). Angioreactors are loaded with growth factor reduced basement membrane extract (BME, Trevigen) and either medium alone (control), or with MDAMB231 cell MVs, and then implanted into mice. Seven-ten days later, they are removed and the relative amounts of endothelial cells that entered (invaded) the reactors are determined. Data of the *in vivo* angiogenesis assay in Figure 2F was presented.

Figure S3

A.

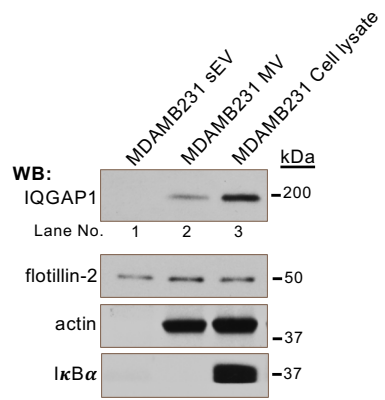

B.

PLC/PRF/5 Cell MVs

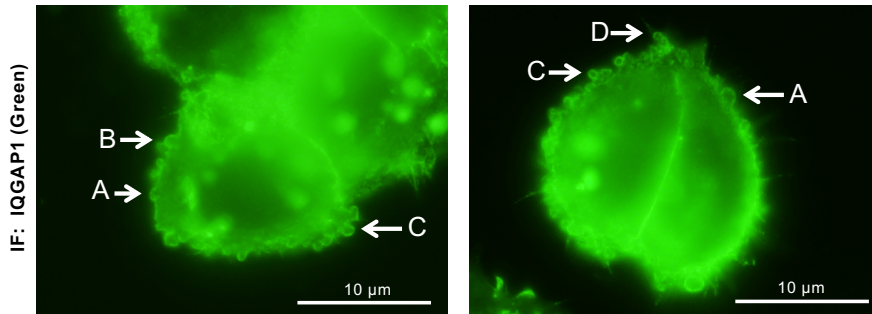

**Figure S3 (Supplementary Figure for Figure 3).** **A**, Small EVs (lane 1) or MVs (lane 2) shed from MDAMB231 cells and MDAMB231 cell lysate (lane 3, 10 $\mu$ g/samples) were immunoblotted with antibodies against IQGAP1, the MV marker protein flotillin-2, actin, and the cytosolic-specific marker I $\kappa$ B $\alpha$ . **B**, Serum-starved PLC/PRF/5 cells were analyzed by immunofluorescent microscopy using IQGAP1 antibody. Arrows indicate the MVs at different steps of shedding: budding (arrow A), stretching (arrow B), closing (arrow C), and release (arrow D).

Figure S4

A.

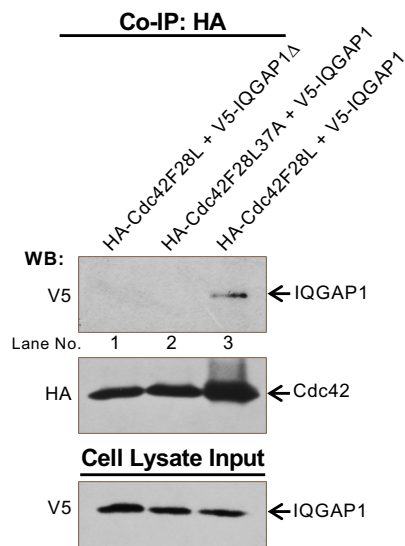

B.

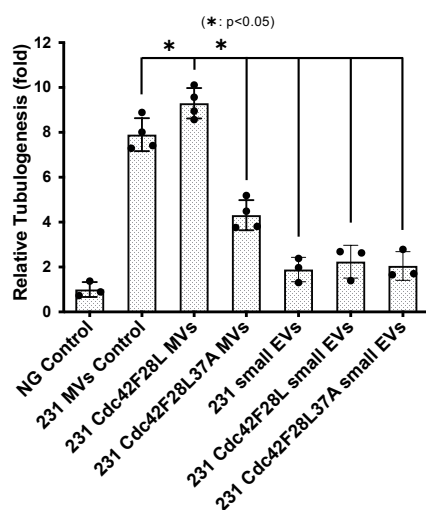

**Relative stimulation of Tubulogenesis**

| Samples       | NG Control    | 231 MV Control | 231 Cdc42F28L MVs       | 231 Cdc42F28L37A MVs       |
|---------------|---------------|----------------|-------------------------|----------------------------|
| Relative fold | 1.000 ± 0.333 | 7.90 ± 0.731   | 9.30 ± 0.679            | 4.31 ± 0.670               |
| Samples       |               | 231 small EVs  | 231 Cdc42F28L small EVs | 231 Cdc42F28L37A small EVs |
| Relative fold |               | 1.890 ± 0.542  | 2.24 ± 0.73             | 2.05 ± 0.64                |

C.

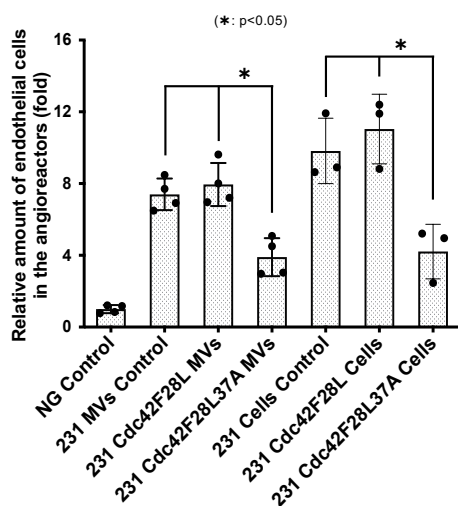

**Amounts of endothelial cells in the angioreactors**

| Samples        | NG Control    | 231 MV Control    | 231 Cdc42F28L MVs   | 231 Cdc42F28L37A MVs   |
|----------------|---------------|-------------------|---------------------|------------------------|
| Avg. IF counts | 1785 ± 399.7  | 13209 ± 1571      | 14191 ± 2142        | 6962 ± 1892            |
| Relative fold  | 1.000 ± 0.224 | 7.4 ± 0.880       | 7.95 ± 1.200        | 3.9 ± 1.060            |
| Samples        |               | 231 Cells Control | 231 Cdc42F28L Cells | 231 Cdc42F28L37A Cells |
| Avg. IF counts |               | 17529 ± 3249      | 19706 ± 3463        | 7515 ± 2713            |
| Relative fold  |               | 9.82 ± 1.820      | 11.04 ± 1.940       | 4.21 ± 1.520           |

**Figure S4 (Supplementary Figure for Figure 5).** **A**, MDAMB231 cells expressing HA-tagged Cdc42F28L together with V5-tagged IQGAP1 $\Delta$  (lane 1), HA-tagged Cdc42F28L37A together with V5-tagged wild type IQGAP1 (lane 2), HA-tagged Cdc42F28L together with V5-tagged wild type IQGAP1 (control, lane 3) were lysed. Immunoprecipitations (IPs) using a HA antibody were performed on the cell lysates (200  $\mu$ g protein). The immunocomplexes were blotted with V5 and HA antibodies. The cell lysates were probed with an V5 antibody to confirm equivalent amounts of sample were used in each IP (bottom panel). **B**, Data of the tubulogenesis assays in Figure 5E was presented. **C**, Data of the *in vivo* angiogenesis assay in Figure 5F was presented.



Figure S5

A.

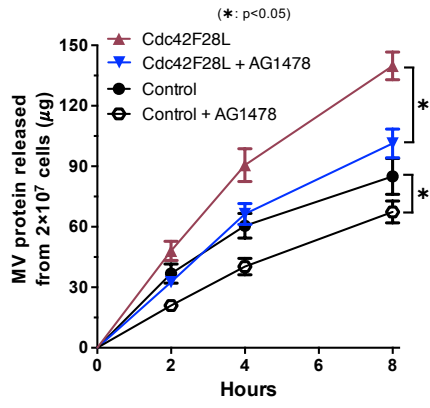

B.

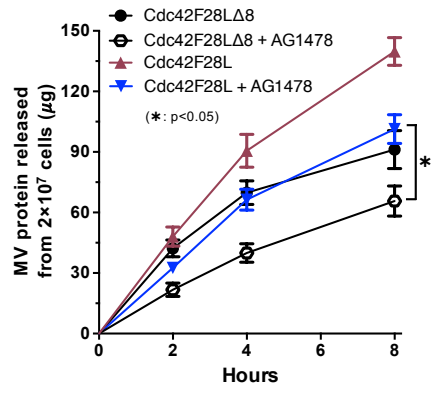

**Figure S5 (Supplementary Figure for Figure 6).** **A**, MDAMB231 cells expressing empty vector (Figure 6D) without (control) or with AG1478 treatment, or HA-tagged Cdc42F28L (Figure 6D) without or with AG1478 treatment were stimulated with EGF (10ng/ml). MVs shed from  $2 \times 10^7$  these cells within 2, 4, and 8 hours after EGF-stimulation were quantified. The difference of the MV shed from these cells with or without AG1478 treatment was statistically significant (\*:  $p < 0.05$ ). **B**, MDAMB231 cells expressing Myc-tagged Cdc42F28L (Figure 6I) without (control) or with AG1478 treatment, or Myc-tagged Cdc42F28L $\Delta$ 8 (Figure 6I) without or with AG1478 treatment were stimulated with EGF (10ng/ml). MVs shed from  $2 \times 10^7$  these cells within 2, 4, and 8 hours after EGF-stimulation were quantified. The difference of the MV shed from these cells with or without AG1478 treatment was statistically significant (\*:  $p < 0.05$ ).

Figure S6

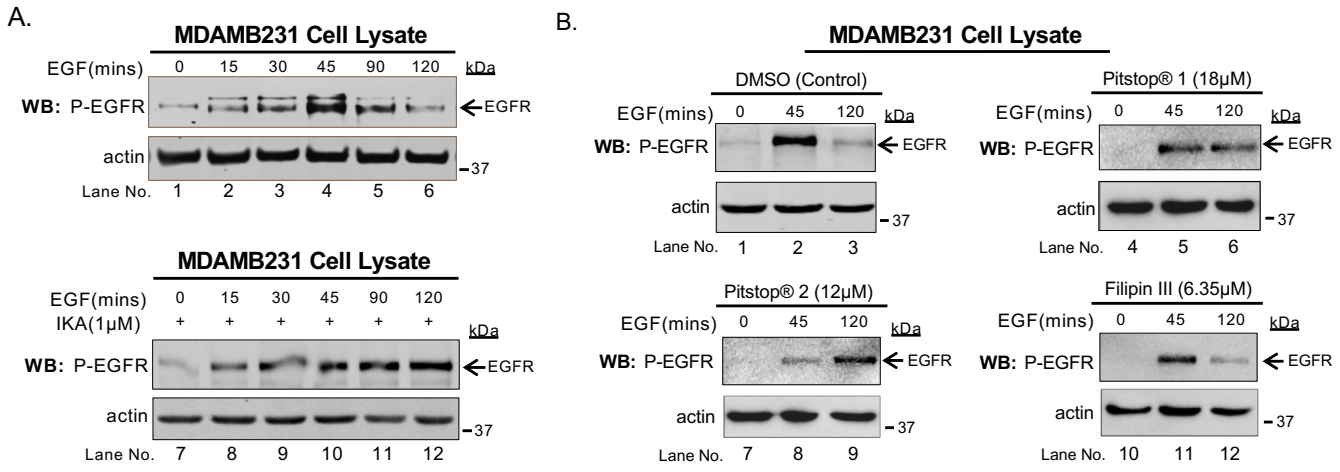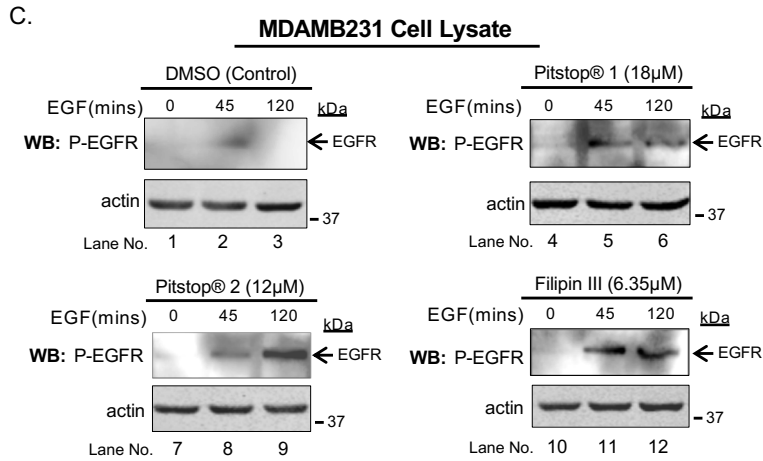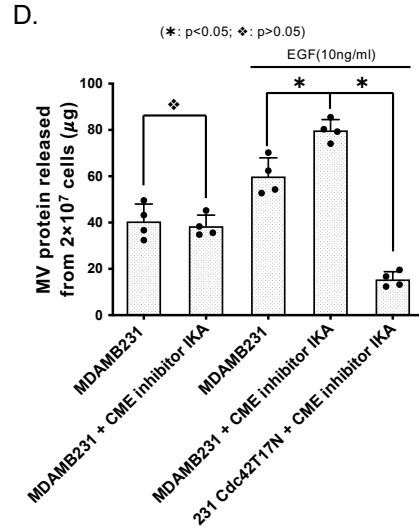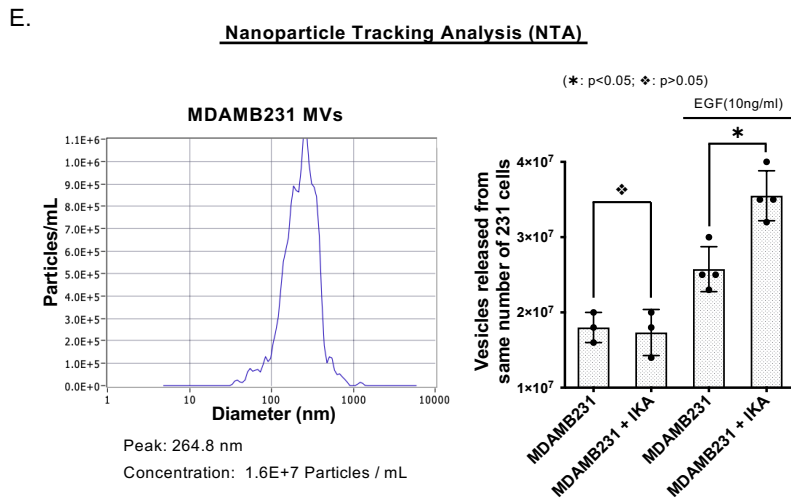

**Figure S6 (Supplementary Figure for Figure 7).** **A**, Top two panels: (same as Figure 6C, top two panels); Bottom two panels: Lysate (15 $\mu$ g/samples) of serum-deprived MDAMB231 cells (pre-incubated with CME inhibitor Ikarugamycin (IKA, 1 $\mu$ M) for 30 minutes) treated with EGF (10ng/ml) for the indicated lengths of time were immunoblotted with antibodies against phosphorylated-EGFR and actin. **B**, Membrane fraction lysate (15 $\mu$ g/samples) of serum-deprived MDAMB231 cell (pre-incubated with 0.5% DMSO (control), CME inhibitor Pitstop<sup>®</sup> 1 (18 $\mu$ M), CME inhibitor Pitstop<sup>®</sup> 2 (12 $\mu$ M), or CIE inhibitor Filipin III (6.35 $\mu$ M) for 30 minutes) treated with EGF (10ng/ml) for the indicated lengths of time were immunoblotted with antibodies against phosphorylated-EGFR, and actin. **C**, Membrane fraction lysate (15 $\mu$ g/samples) of serum-deprived MDAMB231 cell (pre-incubated with 0.5% DMSO (control), CME inhibitor Pitstop<sup>®</sup> 1 (18 $\mu$ M), CME inhibitor Pitstop<sup>®</sup> 2 (12 $\mu$ M), or CIE inhibitor Filipin III (6.35 $\mu$ M) for 30 minutes) treated with EGF (1ng/ml) for the indicated lengths of time were immunoblotted with antibodies against phosphorylated-EGFR and actin. **D**, MDAMB231 cell expressing empty vector (histogram 1-4) or HA-tagged Cdc42T17N (histogram 5) were pre-incubated with (histogram 2, 4, and 5) or without CME inhibitor IKA (1 $\mu$ M) (histogram 1 and 3) for 30 minutes and then stimulated with (histogram 3-5) or without EGF (10ng/ml) (histogram 1 and 2). MVs released within 4 hours from  $2 \times 10^7$  these cells were isolated and quantified. With EGF stimulation, CME inhibitor IKA promoted MV release (histogram 4 vs histogram 3;  $\ast$ :  $p < 0.05$ ) and Cdc42T17N still inhibited MV release (histogram 5 vs histogram 4;  $\ast$ :  $p < 0.05$ ). Without EGF stimulation, CME inhibitor IKA did not increase MV release (histogram 2 vs histogram 1;  $\diamond$ :  $p > 0.05$ ). **E**, MDAMB231 cells were pre-incubated with (histogram 2 and 4) or without CME inhibitor IKA (1 $\mu$ M) (histogram 1 and 3) for 30 minutes and then stimulated with (histogram 3 and 4) or without EGF (10ng/ml) (histogram 1 and 2). MVs released within 4 hours from same number of these cells were isolated and then quantified by Nanoparticle tracking analysis (NTA). Left panel: A example of the vesicle number counting result (MDAMB231 MV) was shown. Right panel: A plot presented the number of vesicles measured by NTA. With EGF stimulation, CME inhibitor IKA (1 $\mu$ M) promoted MV release (histogram 4 vs histogram 3;  $\ast$ :  $p < 0.05$ ). Without EGF stimulation, CME inhibitor IKA did not increase MV release (histogram 2 vs histogram 1;  $\diamond$ :  $p > 0.05$ ).
